# Supplementary material for: Glycemic Index, Glycemic Load and Dyslipidemia in Adolescents from Chiapas, Mexico
Source: MDPI journal article supplement (doi:10.3390/nu16101483), 2024-05-14
Supplement: s1 [file s1]

**Table S1.** Top food contributors to dietary GI and its association with abnormal blood lipids (Odds Ratios and 95% Confidence intervals).

| Variables                        |                      | Food items            |                            |                          |                    |                    |                    |                    |                                             |                    |                               |
|----------------------------------|----------------------|-----------------------|----------------------------|--------------------------|--------------------|--------------------|--------------------|--------------------|---------------------------------------------|--------------------|-------------------------------|
|                                  |                      | Tortillas<br>(maize)  | Traditional<br>baked goods | Sweetened<br>Soft Drinks | Rice               | Sugar              | Cookies            | White<br>Bread     | Lemonade<br>or fruit<br>water with<br>sugar | Pasta              | Juices,<br>industrializ<br>ed |
|                                  |                      | % of<br>dietary<br>GI | 38.7                       | 6.6                      | 5.0                | 4.4                | 3.9                | 3.7                | 3.3                                         | 3.1                | 2.6                           |
| Total cholesterol ≥ 200<br>mg/dL | Model 1 <sup>a</sup> | 0.97 (0.94 - 1.01)    | 0.98 (0.94 - 1.01)         | 0.99 (0.97 - 1.02)       | 1.01 (0.99 - 1.04) | 1.00 (0.97 - 1.02) | 1.02 (0.99 - 1.05) | 1.01 (0.99 - 1.03) | 1.00 (0.97 - 1.04)                          | 0.99 (0.95 - 1.03) | 0.99 (0.98 - 1.02)            |
|                                  | Model 2 <sup>b</sup> | 0.97 (0.94 - 1.01)    | 0.98 (0.94 - 1.02)         | 0.99 (0.97 - 1.02)       | 1.01 (0.99 - 1.04) | 1.00 (0.97 - 1.02) | 1.02 (0.99 - 1.05) | 1.01 (0.99 - 1.03) | 1.00 (0.96 - 1.04)                          | 0.98 (0.93 - 1.03) | 0.99 (0.98 - 1.02)            |
|                                  | Model 3 <sup>c</sup> | 0.96 (0.93 - 1.00)    | 0.98 (0.95 - 1.02)         | 0.99 (0.97 - 1.02)       | 1.02 (0.99 - 1.04) | 1.00 (0.98 - 1.02) | 1.03 (1.00 - 1.06) | 1.01 (0.99 - 1.03) | 1.00 (0.96 - 1.04)                          | 0.98 (0.93 - 1.03) | 0.99 (0.98 - 1.02)            |
| HDL-c <40 mg/dL                  | Model 1 <sup>a</sup> | 1.00 (0.98 - 1.02)    | 1.01 (0.99 - 1.02)         | 1.00 (1.00 - 1.01)       | 1.00 (0.99 - 1.01) | 1.01 (1.00 - 1.02) | 0.99 (0.98 - 1.00) | 1.00 (0.99 - 1.01) | 1.00 (0.98 - 1.01)                          | 1.01 (1.00 - 1.02) | 1.00 (0.99 - 1.02)            |
|                                  | Model 2 <sup>d</sup> | 1.00 (0.98 - 1.02)    | 1.01 (0.99 - 1.02)         | 1.00 (0.99 - 1.01)       | 1.00 (0.98 - 1.01) | 1.01 (1.00 - 1.02) | 0.99 (0.98 - 1.01) | 1.00 (0.99 - 1.01) | 1.00 (0.98 - 1.01)                          | 1.01 (1.00 - 1.02) | 1.00 (0.99 - 1.02)            |
|                                  | Model 3 <sup>e</sup> | 1.00 (0.98 - 1.02)    | 1.01 (0.99 - 1.02)         | 1.00 (0.99 - 1.01)       | 1.00 (0.98 - 1.01) | 1.00 (0.99 - 1.01) | 0.99 (0.98 - 1.00) | 1.00 (0.99 - 1.01) | 1.00 (0.98 - 1.01)                          | 1.01 (1.00 - 1.02) | 1.00 (0.99 - 1.02)            |
| LDL-c ≥ 110 mg/dL                | Model 1 <sup>a</sup> | 0.98 (0.95 - 1.01)    | 0.97 (0.94 - 1.01)         | 1.00 (0.98 - 1.02)       | 1.01 (0.99 - 1.03) | 0.99 (0.97 - 1.01) | 1.01 (0.99 - 1.04) | 1.02 (0.99 - 1.03) | 1.03 (0.99 - 1.06)                          | 0.98 (0.94 - 1.02) | 1.01 (0.99 - 1.05)            |
|                                  | Model 2 <sup>b</sup> | 0.98 (0.95 - 1.01)    | 0.97 (0.94 - 1.01)         | 1.00 (0.98 - 1.02)       | 1.01 (0.99 - 1.03) | 0.99 (0.97 - 1.01) | 1.02 (0.99 - 1.04) | 1.02 (0.99 - 1.04) | 1.03 (0.99 - 1.06)                          | 0.97 (0.93 - 1.02) | 1.01 (0.99 - 1.05)            |
|                                  | Model 3 <sup>f</sup> | 0.97 (0.93 - 1.00)    | 0.98 (0.95 - 1.02)         | 1.00 (0.98 - 1.03)       | 1.01 (0.99 - 1.04) | 0.99 (0.97 - 1.01) | 1.02 (1.00 - 1.05) | 1.01 (0.99 - 1.04) | 1.03 (0.99 - 1.06)                          | 0.98 (0.94 - 1.02) | 1.01 (0.99 - 1.05)            |
| Triglycerides ≥ 130<br>mg/dL     | Model 1 <sup>a</sup> | 1.00 (0.97 - 1.02)    | 0.99 (0.97 - 1.00)         | 1.00 (0.99 - 1.01)       | 0.99 (0.97 - 1.00) | 1.00 (0.99 - 1.01) | 1.01 (1.00 - 1.02) | 1.00 (0.99 - 1.01) | 1.00 (0.98 - 1.01)                          | 1.01 (0.99 - 1.02) | 0.99 (0.98 - 1.01)            |
|                                  | Model 2 <sup>b</sup> | 1.00 (0.97 - 1.02)    | 0.99 (0.97 - 1.00)         | 1.00 (0.99 - 1.01)       | 0.99 (0.97 - 1.00) | 1.00 (0.99 - 1.01) | 1.01 (1.00 - 1.02) | 1.00 (0.99 - 1.01) | 1.00 (0.98 - 1.01)                          | 1.01 (0.99 - 1.02) | 0.99 (0.98 - 1.01)            |
|                                  | Model 3 <sup>g</sup> | 0.99 (0.97 - 1.01)    | 0.99 (0.98 - 1.00)         | 1.00 (0.99 - 1.01)       | 0.99 (0.97 - 1.00) | 1.00 (0.99 - 1.01) | 1.02 (1.00 - 1.03) | 1.00 (0.99 - 1.01) | 1.00 (0.98 - 1.02)                          | 1.01 (0.99 - 1.02) | 0.99 (0.97 - 1.01)            |

<sup>a</sup> Adjusted for sex. <sup>b</sup> Adjusted for sex and body fat percentage (normal vs. high). <sup>c</sup> Adjusted for sex, body fat percentage (normal vs. high) and energy-adjusted protein intake (grams per day). <sup>d</sup> Adjusted for sex and language of the mother (Spanish vs. Indigenous). <sup>e</sup> Adjusted for sex, language of the mother (Spanish vs. Indigenous) and protein intake (percentage of total energy intake per day). <sup>f</sup> Adjusted for sex, body fat percentage (normal vs. high) and protein intake (percentage of total energy intake per day). <sup>g</sup> Adjusted for sex, body fat percentage (normal vs. high) and energy-adjusted dietary fiber intake (grams per day).

**Table S2.** Top food contributors to dietary GL and its association with abnormal blood lipids (Odds Ratios and 95% Confidence intervals).

| Variables                        |                      | Food items                 |                               |                          |                       |                       |                       |                                             |                       |                               |                       |
|----------------------------------|----------------------|----------------------------|-------------------------------|--------------------------|-----------------------|-----------------------|-----------------------|---------------------------------------------|-----------------------|-------------------------------|-----------------------|
|                                  |                      | Tortillas<br>(maize)       | Traditional<br>baked<br>goods | Sweetened<br>Soft Drinks | Rice                  | Sugar                 | Cookies               | Lemonade<br>or fruit<br>water with<br>sugar | White<br>Bread        | Juices,<br>industrializ<br>ed | Pasta                 |
|                                  |                      | % of dietary<br>GL<br>39.6 | 6.8                           | 5.1                      | 4.3                   | 3.8                   | 3.6                   | 3.0                                         | 2.9                   | 2.7                           | 2.7                   |
| Total cholesterol ≥ 200<br>mg/dL | Model 1 <sup>a</sup> | 0.99 (0.97 -<br>1.01)      | 0.97 (0.94 -<br>1.01)         | 0.98 (0.93 -<br>1.04)    | 1.02 (0.99 -<br>1.05) | 1.02 (0.92 -<br>1.12) | 1.01 (0.98 -<br>1.05) | 1.00 (0.97 -<br>1.04)                       | 1.01 (0.97 -<br>1.04) | 0.96 (0.94 -<br>1.03)         | 0.98 (0.91 -<br>1.06) |
|                                  | Model 2 <sup>b</sup> | 0.99 (0.97 -<br>1.02)      | 0.98 (0.94 -<br>1.02)         | 0.99 (0.94 -<br>1.04)    | 1.02 (0.99 -<br>1.05) | 1.03 (0.93 -<br>1.15) | 1.02 (0.98 -<br>1.05) | 1.01 (0.96 -<br>1.05)                       | 1.00 (0.96 -<br>1.04) | 0.96 (0.95 -<br>1.03)         | 0.97 (0.89 -<br>1.06) |
|                                  | Model 3 <sup>c</sup> | 0.99 (0.97 -<br>1.02)      | 0.98 (0.94 -<br>1.02)         | 0.99 (0.94 -<br>1.04)    | 1.02 (0.99 -<br>1.05) | 1.03 (0.93 -<br>1.15) | 1.02 (0.98 -<br>1.05) | 1.01 (0.96 -<br>1.05)                       | 1.00 (0.96 -<br>1.04) | 0.96 (0.95 -<br>1.03)         | 0.97 (0.89 -<br>1.06) |
| HDL-c <40 mg/dL                  | Model 1 <sup>a</sup> | 1.00 (0.99 -<br>1.01)      | 1.02 (1.00 -<br>1.03)         | 1.00 (0.99 -<br>1.02)    | 0.99 (0.98 -<br>1.01) | 1.03 (0.98 -<br>1.08) | 0.99 (0.97 -<br>1.01) | 0.99 (0.97 -<br>1.01)                       | 0.99 (0.97 -<br>1.01) | 1.00 (0.98 -<br>1.03)         | 1.02 (0.99 -<br>1.05) |
|                                  | Model 2 <sup>d</sup> | 1.00 (0.99 -<br>1.01)      | 1.02 (1.00 -<br>1.03)         | 1.00 (0.99 -<br>1.02)    | 0.99 (0.98 -<br>1.01) | 1.03 (0.98 -<br>1.08) | 0.99 (0.97 -<br>1.02) | 0.99 (0.97 -<br>1.01)                       | 0.99 (0.97 -<br>1.01) | 1.00 (0.98 -<br>1.03)         | 1.02 (0.99 -<br>1.05) |
|                                  | Model 3 <sup>e</sup> | 1.00 (1.00 -<br>1.01)      | 1.01 (1.00 -<br>1.03)         | 1.00 (0.98 -<br>1.02)    | 0.99 (0.98 -<br>1.01) | 1.02 (0.98 -<br>1.07) | 0.99 (0.97 -<br>1.01) | 0.99 (0.97 -<br>1.01)                       | 0.99 (0.97 -<br>1.01) | 1.00 (0.98 -<br>1.03)         | 1.02 (0.99 -<br>1.05) |
| LDL-c ≥ 110 mg/dL                | Model 1 <sup>a</sup> | 0.99 (0.97 -<br>1.01)      | 0.96 (0.90 -<br>1.01)         | 0.99 (0.95 -<br>1.03)    | 1.02 (0.99 -<br>1.05) | 0.95 (0.82 -<br>1.11) | 1.01 (0.97 -<br>1.04) | 1.04 (0.99 -<br>1.08)                       | 1.02 (0.99 -<br>1.06) | 0.95 (0.94 -<br>1.02)         | 0.98 (0.90 -<br>1.05) |
|                                  | Model 2 <sup>f</sup> | 0.99 (0.96 -<br>1.01)      | 0.96 (0.90 -<br>1.02)         | 0.99 (0.95 -<br>1.03)    | 1.02 (0.99 -<br>1.04) | 0.96 (0.81 -<br>1.14) | 1.02 (0.98 -<br>1.06) | 1.04 (0.99 -<br>1.09)                       | 1.02 (0.99 -<br>1.05) | 0.93 (0.92 -<br>1.01)         | 0.96 (0.89 -<br>1.04) |
|                                  | Model 3 <sup>g</sup> | 0.98 (0.95 -<br>1.01)      | 0.97 (0.91 -<br>1.03)         | 0.99 (0.95 -<br>1.04)    | 1.02 (0.99 -<br>1.05) | 0.97 (0.81 -<br>1.16) | 1.02 (0.99 -<br>1.06) | 1.04 (0.99 -<br>1.10)                       | 1.02 (0.99 -<br>1.05) | 0.93 (0.91 -<br>1.01)         | 0.97 (0.89 -<br>1.05) |
| Triglycerides ≥ 130<br>mg/dL     | Model 1 <sup>a</sup> | 1.00 (1.00 -<br>1.01)      | 0.98 (0.96 -<br>1.00)         | 0.99 (0.97 -<br>1.01)    | 0.98 (0.96 -<br>1.00) | 0.98 (0.94 -<br>1.03) | 1.02 (1.00 -<br>1.04) | 0.99 (0.97 -<br>1.01)                       | 1.00 (0.98 -<br>1.02) | 0.97 (0.94 -<br>1.01)         | 1.02 (0.99 -<br>1.05) |
|                                  | Model 2 <sup>f</sup> | 1.01 (1.00 -<br>1.01)      | 0.98 (0.96 -<br>1.00)         | 0.99 (0.97 -<br>1.01)    | 0.98 (0.96 -<br>1.00) | 0.99 (0.94 -<br>1.04) | 1.02 (1.00 -<br>1.04) | 0.99 (0.97 -<br>1.01)                       | 0.99 (0.97 -<br>1.02) | 0.97 (0.93 -<br>1.01)         | 1.02 (0.99 -<br>1.05) |
|                                  | Model 3 <sup>h</sup> | 1.00 (0.99 -<br>1.01)      | 0.98 (0.97 -<br>1.00)         | 0.99 (0.97 -<br>1.02)    | 0.98 (0.96 -<br>1.01) | 0.99 (0.94 -<br>1.04) | 1.03 (1.01 -<br>1.06) | 1.00 (0.98 -<br>1.03)                       | 1.00 (0.98 -<br>1.03) | 0.97 (0.93 -<br>1.01)         | 1.02 (0.98 -<br>1.05) |

<sup>a</sup> Adjusted for sex. <sup>b</sup> Adjusted for sex and weight status (underweight or normal vs. overweight or obesity). <sup>c</sup> Adjusted for sex, weight status (underweight or normal vs. overweight or obesity) and protein intake (percentage of total energy intake per day). <sup>d</sup> Adjusted for sex and mother's education (<6 years vs. ≥6 years). <sup>e</sup> Adjusted for sex, mother's education (<6 years vs. ≥6 years) and energy-adjusted dietary fiber intake (grams per day). <sup>f</sup> Adjusted for sex and body fat percentage (normal vs. high). <sup>g</sup> Adjusted for sex, body fat percentage (normal vs. high) and protein intake (percentage of total energy intake per day). <sup>h</sup> Adjusted for sex, body fat percentage (normal vs. high) and energy-adjusted dietary fiber intake (grams per day).
